# Supplementary material for: Fabrication of Functional bioMOF-100 Prototype as Drug Delivery System for Breast Cancer Therapy
Source: MDPI journal article supplement (doi:10.3390/pharmaceutics14112458), 2022-11-15
Supplement: s1 [file s1]

## SUPPORTING INFORMATION

# Fabrication of Functional bioMOF-100 Prototype as Drug Delivery System for Breast Cancer Therapy

**Renata Carolina Alves <sup>1,\*</sup>, Richard Perosa Fernandes <sup>2</sup>, Renan Lira de Farias <sup>3</sup>, Patricia Bento da Silva <sup>4</sup>, Raquel Santos Faria <sup>4</sup>, Christian Rafael Quijia <sup>1</sup>, Regina Célia Galvão Frem <sup>5</sup>, Ricardo Bentes Azevedo <sup>4</sup> and Marlus Chorilli <sup>1</sup>**

<sup>1</sup> Department of Drugs and Medicines, School of Pharmaceutical Sciences, São Paulo State University (UNESP), Rodovia Araraquara Jau, Km 01—s/n—Campos Ville, Araraquara 14800-903, Brazil

<sup>2</sup> Department of Chemistry, Federal University of Mato Grosso (UFMT), Cuiabá 78060-900, Brazil

<sup>3</sup> Departament of Chemical, Pontifícia Universidade Católica do Rio de Janeiro, Rio de Janeiro 22451-900, Brazil

<sup>4</sup> Department of Genetics and Morphology, Institute of Biological Sciences, University of Brasilia (UnB), Campus Universitario Darcy Ribeiro—Asa Norte, Brasilia 70910-900, Brazil

<sup>5</sup> Chemistry Institute, São Paulo State University (UNESP), Campus Araraquara, Araraquara 14800-060, Brazil

\* Correspondence: renata88\_alves@hotmail.com

**Figure S1.** Analytical curve of the CCM in methanol solution obtained by the chromatographic method.

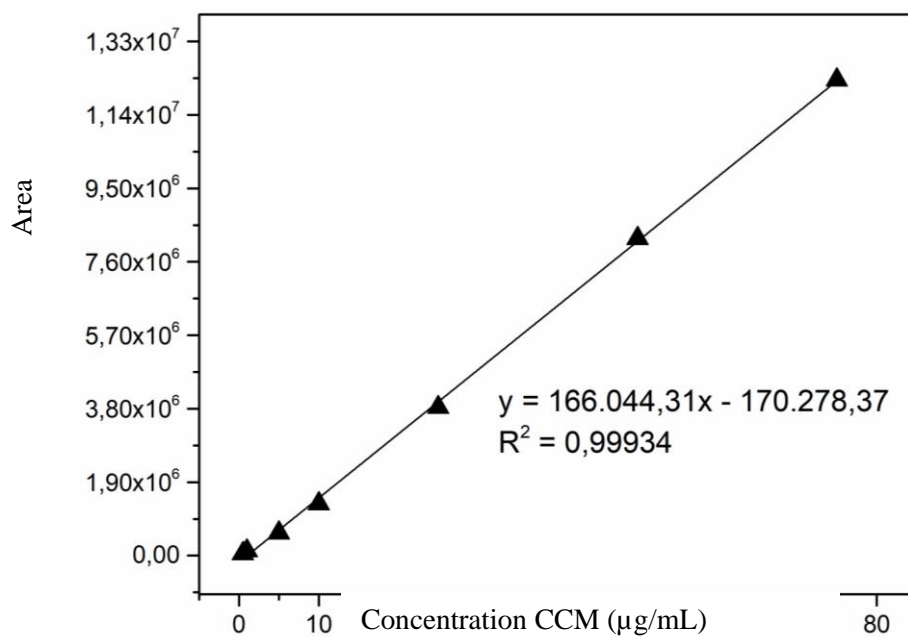

**Figure S2.** Optical polarized light microscopy of the solvated compounds: A) bioMOF-100, B) RCA.

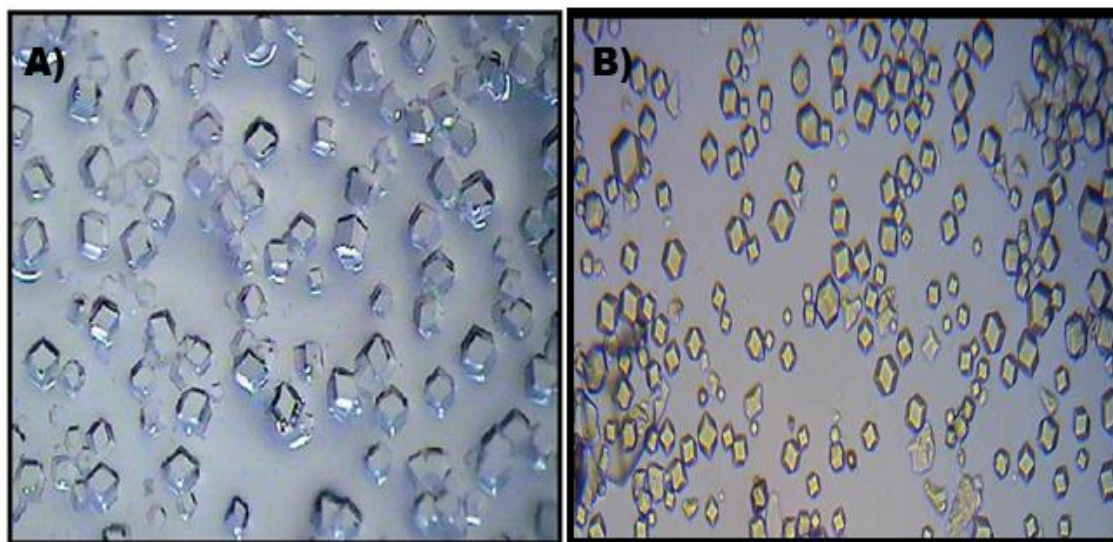

**Figure S3.** TGA-DSC curves of the RCA compound.

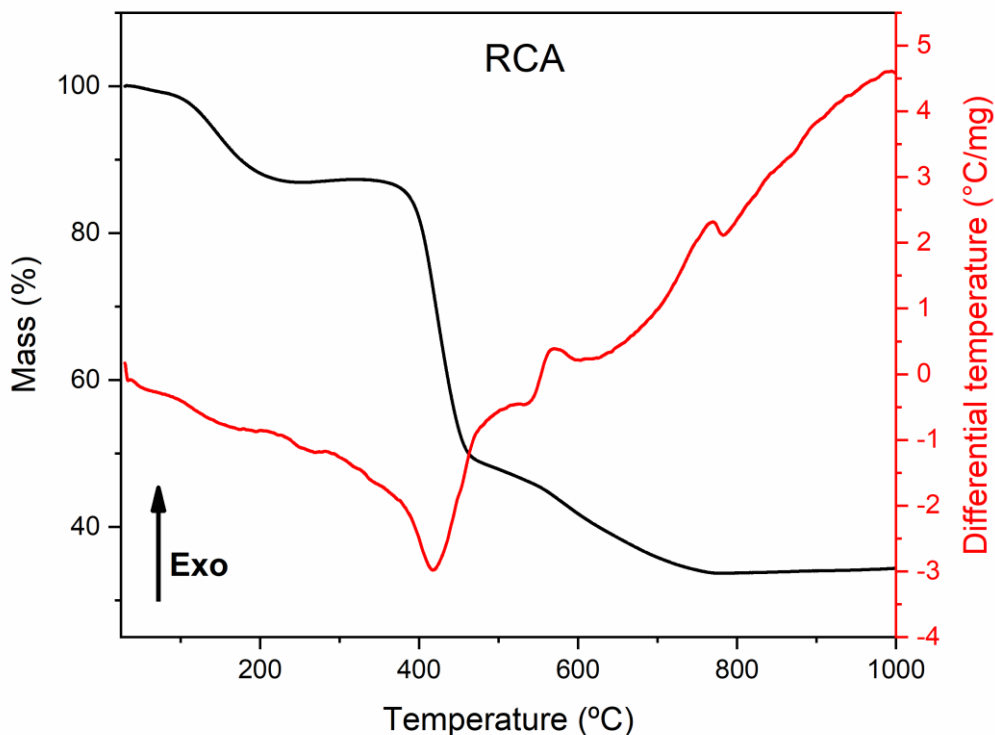

The TG curve shows mass losses in three stages, presenting two well-defined levels. The mass loss observed at the beginning of heating, between 30-113 °C (3.84%) can be attributed to the dehydration of the material. The second weight loss of 11.43%, observed between 113-374 °C, suggests the elimination of the DMF solvent and dimethylammonium cations, resulting from the thermal decomposition of DMF under solvothermic conditions. The third mass loss of 50.75%, observed between 374 and 782 °C, corresponds to the endothermic peak in the DSC curve at 417 °C, followed by two exothermic events at 571 and 767 °C, which may refer to the decomposition of the two ligands, followed by pyrolysis of the material.

**Figure S4.** Simulated crystalline structure of BioMOF-100, which has 85.5% voids/cell. The probe used consisted of a spherical molecule of  $H_{2(g)}$ , containing 1.2 Å radius.

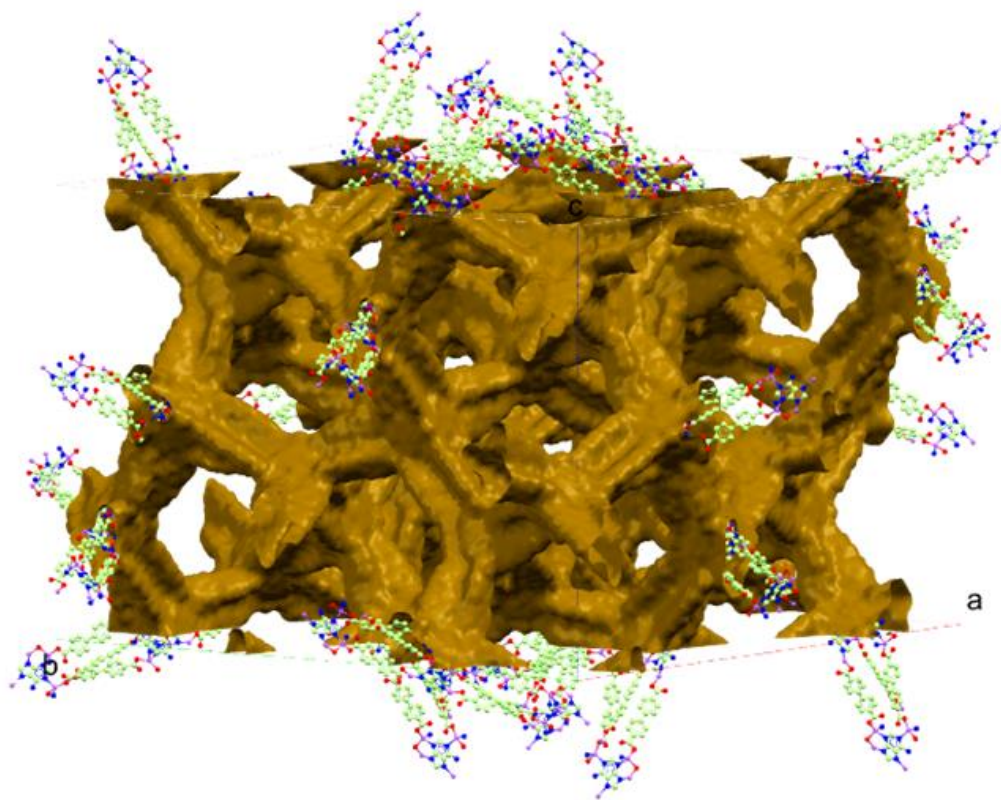

**Figure S5.** (a-b) accessible cavities referring to the existing solvent channels along the crystallographic direction [110].

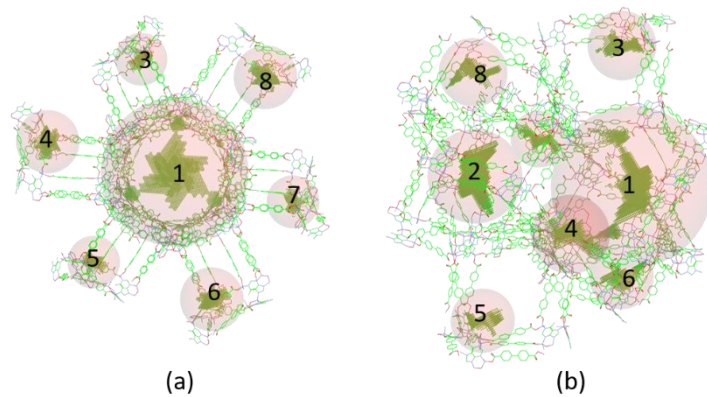

**Figure S6.** TG-DSC curves of the CCM@RCA-1D compound

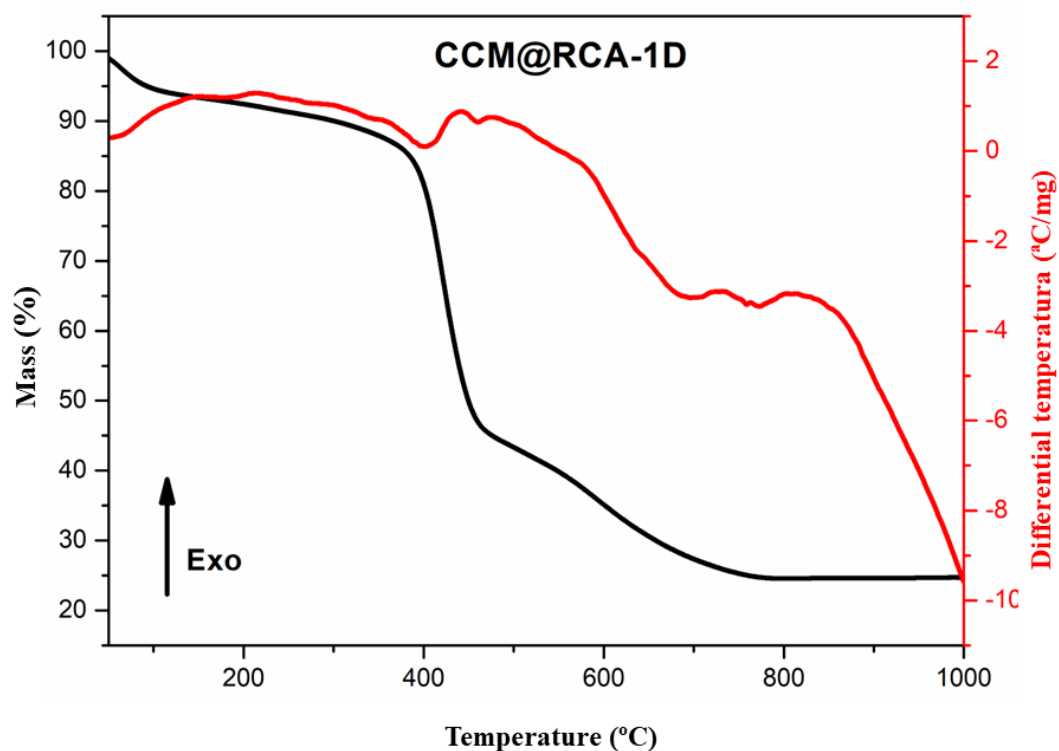

TG-DSC curves of the compound obtained after the CCM encapsulation test with a contact time of 1 day (CCM@RCA-1D). The TG curve presents mass losses in three stages, the first being 5.77% between 30-110 °C, which can be attributed to the dehydration of the material. The second loss of 6.07% of mass, observed between 110-355 °C, suggests the exit of solvent molecules and CCM molecules retained in the pores and/or on the surface of the material

**Figure S7.** Analytical curves of CCM in receptor medium obtained by the chromatographic method: A) at pH = 5.0 and B) at pH = 7.4.

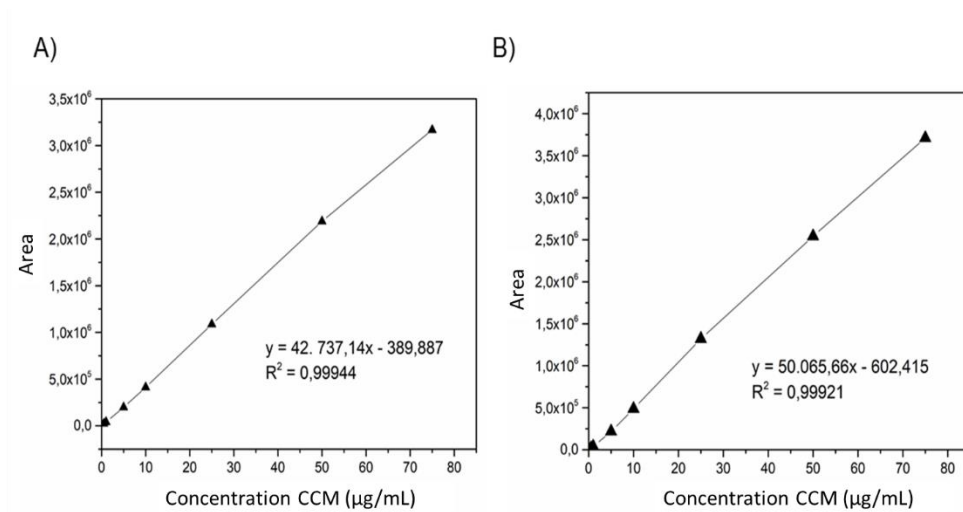

**Table S1.** Probability level relationship, conformer identification and RMSD.

| Probability | Conformer | RMSD / Å |
|-------------|-----------|----------|
| 1           | 40        | 0,8902   |
| 1           | 14        | 0,9107   |
| 1           | 41        | 0,9509   |
| 1           | 12        | 0,9808   |
| 1           | 19        | 0,9974   |

**Table S2.** Percentage of CCM released from samples after 132 hours of experiment.

| pH  | Compounds     | % CCM released |
|-----|---------------|----------------|
| 5,0 | CCM@RCA-1D    | 28,14          |
|     | CCM@RCA-1D/FA | 9,89           |
| 7,4 | CCM@RCA-1D    | 9,58           |

**Table S3.** IC<sub>50</sub> values of RCA precursors and series of compounds along with their IS values. IS<sup>\*</sup>=IC<sub>50</sub> (NIH/3T3) / IC<sub>50</sub>(MCF-7); IS<sup>\*\*</sup>= IC<sub>50</sub> (NIH/3T3) / IC<sub>50</sub>(MDA-MB-321) e IS<sup>\*\*\*</sup>= IC<sub>50</sub> (NIH/3T3) / IC<sub>50</sub>(4T1).

| Composts      | IC <sub>50</sub> (µg/mL) |              |                 |              |                  |               |                   |
|---------------|--------------------------|--------------|-----------------|--------------|------------------|---------------|-------------------|
|               | NIH/3T3                  | MCF-7        | IS <sup>*</sup> | MDA-MB-231   | IS <sup>**</sup> | 4T1           | IS <sup>***</sup> |
| Adenine       | –                        | –            | –               | –            | –                | –             | –                 |
| BPDC          | –                        | –            | –               | –            | –                | –             | –                 |
| CCM           | 25,87 ± 7,3              | 27,40 ± 6,23 | 0,94            | 26,63 ± 5,8  | 0,97             | –             | –                 |
| Acid Folic    | –                        | –            | –               | –            | –                | –             | –                 |
| RCA           | 42,85 ± 4,05             | 56,55 ± 7,01 | 0,76            | 84,51 ± 6,02 | 0,51             | –             | –                 |
| CCM@RCA-1D    | 34,19 ± 6,14             | 49,25 ± 6,05 | 0,70            | 69,00 ± 5,15 | 0,50             | 93,33 ± 9,9   | 0,37              |
| CCM@RCA-1D/FA | –                        | 35,61 ± 3,07 | –               | 713,9 ± 9,38 | –                | 97,64 ± 10,96 | –                 |
